# Supplementary material for: Kidney Function-Dependence of Vitamin K-Status Parameters: Results from the TransplantLines Biobank and Cohort Studies
Source: MDPI journal article supplement (doi:10.3390/nu13093069), 2021-08-31
Supplement: s1 [file s1]

# Supplementary

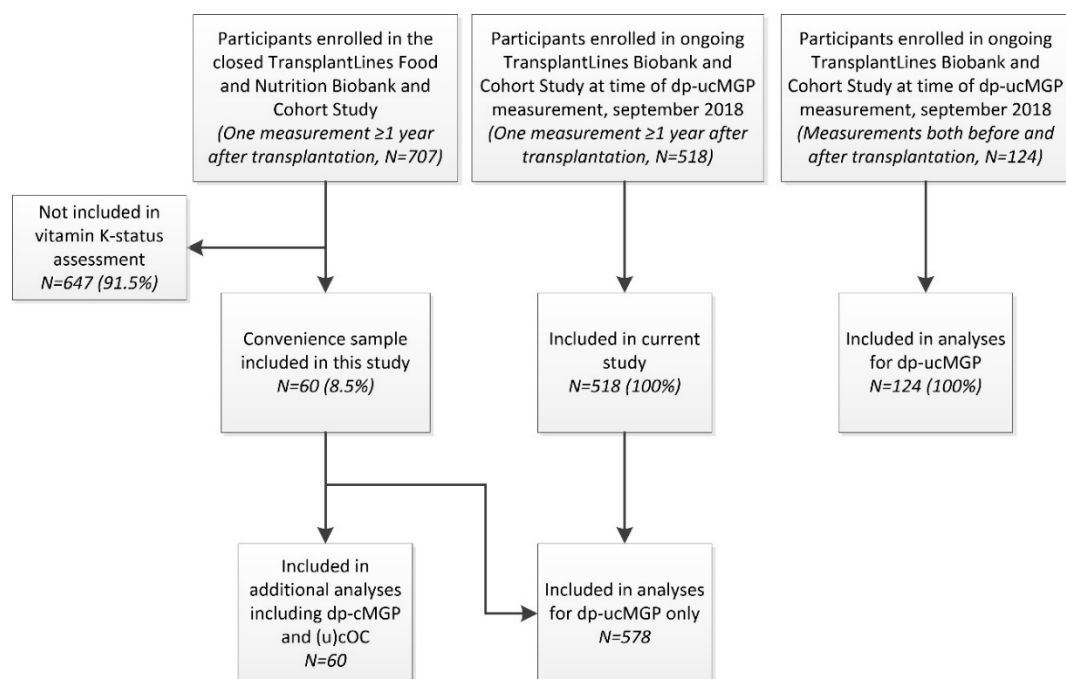

**Figure S1.** Diagram visualizing the flow of participants through the study.

**Table S1.** Linear regression analyses with plasma dp-ucMGP as the dependent variable in a subgroup of 60 kidney transplant recipients from cohort 1.

|                | Variable                                        | Change in dp-ucMGP | T-value | P-value | Model R <sup>2</sup> |
|----------------|-------------------------------------------------|--------------------|---------|---------|----------------------|
| <b>Model 1</b> | Vitamin K-antagonist use, yes vs. no            | + 185.4%           | -       | <0.001  | 0.372                |
| <b>Model 2</b> | eGFR, per 10 ml/min/1.73m <sup>2</sup> increase | - 15.0%            | -       | <0.001  | 0.251                |
| <b>Model 3</b> | Vitamin K-antagonist use, yes vs. no            | + 149.7%           | 5.80    | <0.001  | 0.537                |
|                | eGFR, per 10 ml/min/1.73m <sup>2</sup> increase | - 12.3%            | -4.50   | <0.001  |                      |

Change in dp-ucMGP indicates the percentage of change in dp-ucMGP for vitamin K-antagonist use, and eGFR (per 10 mL/min/1.73m<sup>2</sup> increase), where + indicates increasing and – indicate decreasing dp-ucMGP. T-values indicate the size of the difference relative to the variation in the data, thus allowing for comparison of the strengths of the associations of vitamin K-antagonist use and eGFR in model 3. Abbreviations: eGFR: creatinine-based estimated glomerular filtration rate as calculated using the CKD-EPI formula.

**Table S2.** Linear regression analyses with plasma ucOC as the dependent variable in a subgroup of 60 kidney transplant recipients from cohort 1.

|                | Variable                                        | Change in ucOC | T-value | P-value | Model R <sup>2</sup> |
|----------------|-------------------------------------------------|----------------|---------|---------|----------------------|
| <b>Model 1</b> | Vitamin K-antagonist use, yes vs. no            | + 404.4%       | -       | <0.001  | 0.175                |
| <b>Model 2</b> | eGFR, per 10 ml/min/1.73m <sup>2</sup> increase | - 16.7%        | -       | 0.049   | 0.065                |
| <b>Model 3</b> | Vitamin K-antagonist use, yes vs. no            | + 341.5%       | 3.20    | 0.002   | 0.208                |
|                | eGFR, per 10 ml/min/1.73m <sup>2</sup> increase | - 12.3%        | -1.53   | 0.132   |                      |

Change in dp-ucMGP indicates the percentage of change in dp-ucMGP for vitamin K-antagonist use, and eGFR (per 10 mL/min/1.73m<sup>2</sup> increase), where + indicates increasing and – indicate decreasing dp-ucMGP. T-values indicate the size of the difference relative to the variation in the data, thus allowing for comparison of the strengths of the associations of vitamin K-antagonist use and eGFR in model 3. Abbreviations: eGFR: creatinine-based estimated glomerular filtration rate as calculated using the CKD-EPI formula.

**Table S3.** Linear regression analyses with proportion of dp-ucMGP over total MGP as the dependent variable in a subgroup of 60 kidney transplant recipients from cohort 1.

|                | Variable                                        | Change in proportion uncarboxylated MGP | T-value | P-value | Model R <sup>2</sup> |
|----------------|-------------------------------------------------|-----------------------------------------|---------|---------|----------------------|
| <b>Model 1</b> | Vitamin K-antagonist use, yes vs. no            | + 77.5%                                 | -       | <0.001  | 0.267                |
| <b>Model 2</b> | eGFR, per 10 ml/min/1.73m <sup>2</sup> increase | - 0.0%                                  | -       | 0.512   | 0.007                |
| <b>Model 3</b> | Vitamin K-antagonist use, yes vs. no            | + 77.9%                                 | 4.49    | <0.001  | 0.267                |
|                | eGFR, per 10 ml/min/1.73m <sup>2</sup> increase | - 0.0%                                  | 0.10    | 0.924   |                      |

Change in dp-ucMGP indicates the percentage of change in dp-ucMGP for vitamin K-antagonist use, and eGFR (per 10 mL/min/1.73m<sup>2</sup> increase), where + indicates increasing and – indicate decreasing dp-ucMGP. T-values indicate the size of the difference relative to the variation in the data, thus allowing for comparison of the strengths of the associations of vitamin K-antagonist use and eGFR in model 2. Abbreviations: eGFR: creatinine-based estimated glomerular filtration rate as calculated using the CKD-EPI formula.

**Table S4.** Linear regression analyses with proportion ucOC over total OC as the dependent variable in a subgroup of 60 kidney transplant recipients from cohort 1.

|                | Variable                                        | Change in proportion uncarboxylated OC | T-value | P-value | Model R <sup>2</sup> |
|----------------|-------------------------------------------------|----------------------------------------|---------|---------|----------------------|
| <b>Model 1</b> | Vitamin K-antagonist use, yes vs. no            | + 396.8%                               | -       | <0.001  | 0.341                |
| <b>Model 2</b> | eGFR, per 10 ml/min/1.73m <sup>2</sup> increase | - 9.2%                                 | -       | 0.146   | 0.036                |
| <b>Model 3</b> | Vitamin K-antagonist use, yes vs. no            | + 376.1%                               | 5.22    | <0.001  | 0.348                |
|                | eGFR, per 10 ml/min/1.73m <sup>2</sup> increase | - 4.1%                                 | -0.76   | 0.761   |                      |

Change in dp-ucMGP indicates the percentage of change in dp-ucMGP for vitamin K-antagonist use, and eGFR (per 10 mL/min/1.73m<sup>2</sup> increase), where + indicates increasing and – indicate decreasing dp-ucMGP. T-values indicate the size of the difference relative to the variation in the data, thus allowing for comparison of the strengths of the associations of vitamin K-antagonist use and eGFR in model 3. Abbreviations: eGFR: creatinine-based estimated glomerular filtration rate as calculated using the CKD-EPI formula.
